# Supplementary material for: Highly Efficient Ag3PO4/g-C3N4 Z-Scheme Photocatalyst for Its Enhanced Photocatalytic Performance in Degradation of Rhodamine B and Phenol
Source: PubMed Central journal article supplement (PMC8038389; doi:10.3390/molecules26072062), 2021-04-03
Supplement: molecules-26-02062-s001.pdf [file molecules-26-02062-s001.pdf]

# Supplementary Materials

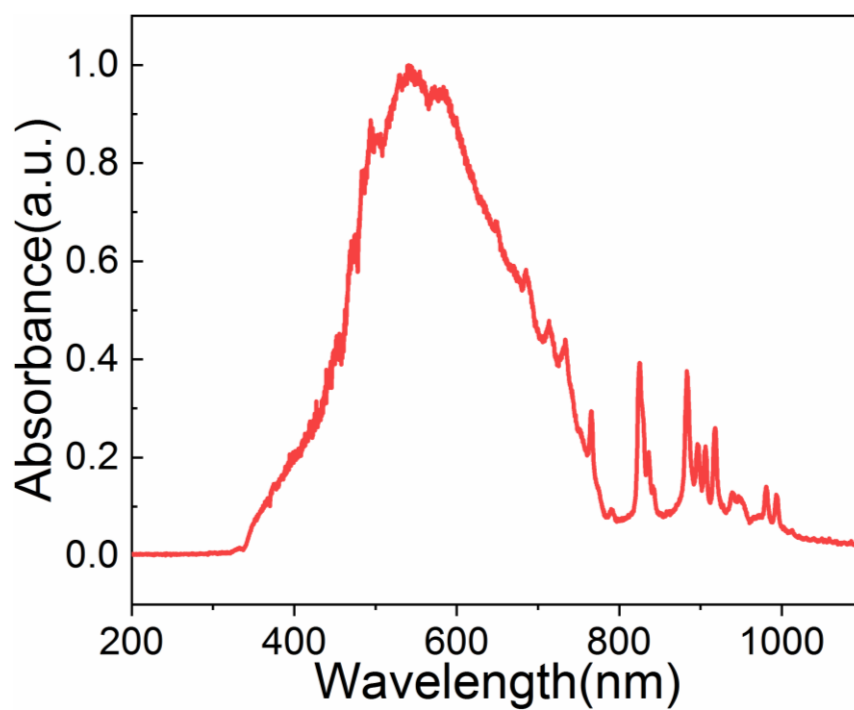

Figure S1 The spectra of xenon lamp.

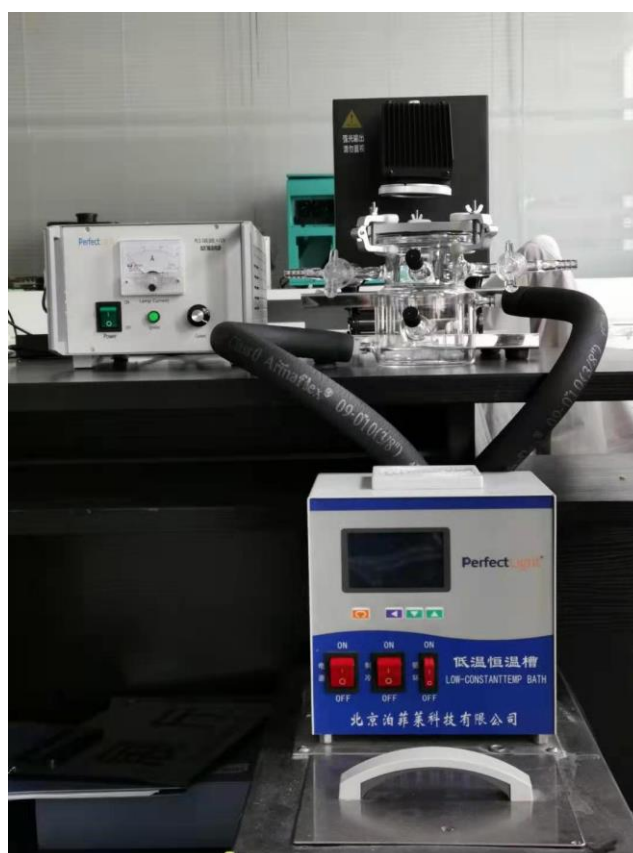

Figure S2 The picture of experimental setup.
